# Supplementary material
Source: PubMed Central journal article supplement (PMC4643528)
Supplement: supp_dev236_dev236supp_table1.pdf [file supp_dev236_dev236supp_table1.pdf]

**Supplementary Table S1** Unadjusted associations of the Mediterranean and Western patterns with semen quality parameters in the Murcia Young Men's Study (n = 209) according to quartiles (Q1–4) of consumption of the two dietary patterns.

| Unadjusted means (95% CI)                                              | Mediterranean pattern |                   |                    |                   |          | Western pattern   |                   |                   |                   |          |
|------------------------------------------------------------------------|-----------------------|-------------------|--------------------|-------------------|----------|-------------------|-------------------|-------------------|-------------------|----------|
|                                                                        | Q1 (n = 53)           | Q2 (n = 51)       | Q3 (n = 53)        | Q4 (n = 52)       | P, trend | Q1 (n = 52)       | Q2 (n = 53)       | Q3 (n = 52)       | Q4 (n = 52)       | P, trend |
| Semen volume (ml)                                                      | 2.55 (2.16, 3.01)     | 2.51 (2.12, 2.98) | 3.23 (2.74, 3.82)* | 2.94 (2.48, 3.49) | 0.12     | 2.97 (2.51, 3.53) | 2.48 (2.10, 2.93) | 3.00 (2.53, 3.56) | 2.77 (2.34, 3.29) | 0.93     |
| Sperm concentration (mill/ml)                                          | 39.4 (30.2, 51.3)     | 38.5 (29.4, 50.4) | 33.7 (25.8, 43.8)  | 38.4 (29.4, 50.2) | 0.84     | 43.6 (33.5, 56.8) | 40.4 (31.1, 52.5) | 36.5 (27.9, 47.5) | 30.4 (23.4, 39.7) | 0.06     |
| Total sperm count (millions)                                           | 100 (78.4, 128)       | 106 (82.9, 138)   | 109 (85.0, 139)    | 127 (98.9, 164)   | 0.17     | 128 (100, 166)    | 100 (78.3, 128)   | 121 (94.2, 155)   | 95.1 (74.1, 122)  | 0.17     |
| Morphologically normal sperm (%)                                       | 9.21 (7.74, 10.9)     | 9.11 (7.64, 10.9) | 8.17 (6.88, 9.69)  | 8.25 (6.93, 9.82) | 0.31     | 7.85 (6.60, 9.35) | 8.82 (7.43, 10.5) | 8.87 (7.46, 10.5) | 9.17 (7.68, 10.9) | 0.26     |
| Total motile sperm (progressive + non-progressive; WHO Grades A–C) (%) | 56.8 (53.9, 59.6)     | 57.9 (55.0, 60.9) | 56.8 (54.0, 59.7)  | 55.7 (52.9, 58.6) | 0.47     | 57.6 (54.0, 60.5) | 57.9 (55.1, 60.7) | 55.6 (52.8, 58.5) | 56.2 (53.3, 59.0) | 0.36     |

\*LSD *post hoc* analyses  $P < 0.05$ , (Q1 = reference category).
