# Supplementary material
Source: PubMed Central journal article supplement (PMC4643528)
Supplement: supp_dev236_dev236supp_table2.pdf [file supp_dev236_dev236supp_table2.pdf]

**Supplementary Table SII Effect of modification of BMI on the relation between the Mediterranean and the Western patterns and semen quality parameters in Murcia Young Men's Study (total  $n = 209$ ; lean men  $n = 141$ ; overweight or obese men  $n = 68$ ) by quartiles (Q1–4) of consumption of the two dietary patterns.**

| Adjusted <sup>a</sup> means (95% CI)                                   | Mediterranean pattern |                   |                   |                   |          | Western pattern        |                   |                   |                    |          |
|------------------------------------------------------------------------|-----------------------|-------------------|-------------------|-------------------|----------|------------------------|-------------------|-------------------|--------------------|----------|
|                                                                        | Q1 (n = 53)           | Q2 (n = 51)       | Q3 (n = 53)       | Q4 (n = 52)       | P, trend | Q1 (n = 52)            | Q2 (n = 53)       | Q3 (n = 52)       | Q4 (n = 52)        | P, trend |
| Semen volume (ml)                                                      | P, interaction = 0.96 |                   |                   |                   |          | P, interaction = 0.93  |                   |                   |                    |          |
| Lean men (BMI <25 kg/m <sup>2</sup> )                                  | 2.81 (2.31, 3.42)     | 2.60 (2.11, 3.19) | 3.19 (2.65, 3.83) | 3.16 (2.56, 3.90) | 0.29     | 3.09 (2.46, 3.87)      | 2.58 (2.11, 3.16) | 3.46 (2.86, 4.18) | 2.71 (2.14, 3.43)  | 0.75     |
| Overweight or obese men (BMI ≥25 kg/m <sup>2</sup> )                   | 2.02 (1.40, 2.92)     | 2.34 (1.70, 3.22) | 3.43 (2.32, 5.06) | 2.57 (1.78, 3.73) | 0.28     | 3.04 (2.09, 4.42)      | 2.17 (1.55, 3.03) | 2.23 (1.54, 3.24) | 2.65 (1.69, 4.15)  | 0.85     |
| Sperm concentration (mill/ml)                                          | P, interaction = 0.55 |                   |                   |                   |          | P, interaction = 0.014 |                   |                   |                    |          |
| Lean men (BMI <25 kg/m <sup>2</sup> )                                  | 39.9 (29.5, 54.2)     | 39.4 (28.6, 54.4) | 31.1 (23.4, 41.5) | 48.3 (35.0, 66.6) | 0.46     | 37.0 (26.1, 52.6)      | 41.1 (29.8, 56.5) | 31.2 (23.2, 42.1) | 48.2 (33.2, 70.0)  | 0.49     |
| Overweight or obese men (BMI ≥25 kg/m <sup>2</sup> )                   | 27.7 (15.9, 48.1)     | 27.4 (17.0, 44.1) | 48.9 (27.2, 87.7) | 40.8 (23.3, 71.3) | 0.20     | 42.2 (25.0, 71.2)      | 32.4 (20.4, 51.6) | 53.5 (31.7, 89.6) | 15.9 (8.52, 29.7)* | 0.04     |
| Total sperm count (mill)                                               | P, interaction = 0.73 |                   |                   |                   |          | P, interaction = 0.15  |                   |                   |                    |          |
| Lean men (BMI <25 kg/m <sup>2</sup> )                                  | 111 (84.5, 146)       | 121 (90.3, 163)   | 99.9 (77.2, 129)  | 152 (113, 75.1)   | 0.18     | 112 (81.6, 156)        | 106 (79.0, 141)   | 126 (96.1, 167)   | 129 (92.3, 181.5)  | 0.51     |
| Overweight or obese men (BMI ≥25 kg/m <sup>2</sup> )                   | 62.1 (35.9, 107)      | 83.2 (51.4, 134)  | 147 (81.0, 266)   | 113 (61.2, 199)   | 0.11     | 144 (83.7, 246)        | 75.3 (46.7, 122)  | 117 (68.3, 201)   | 50.9 (26.4, 98.1)  | 0.05     |
| Morphologically normal sperm (%)                                       | P, interaction = 0.97 |                   |                   |                   |          | P, interaction = 0.12  |                   |                   |                    |          |
| Lean men (BMI <25 kg/m <sup>2</sup> )                                  | 9.16 (7.31, 11.5)     | 9.78 (7.68, 12.4) | 8.61 (6.97, 10.6) | 7.71 (6.07, 9.77) | 0.23     | 6.31 (4.92, 8.10)      | 9.13 (7.28, 11.5) | 8.81 (7.12, 10.9) | 11.3 (8.65, 14.9)* | 0.01     |
| Overweight or obese men (BMI ≥25 kg/m <sup>2</sup> )                   | 9.34 (6.83, 12.8)     | 9.28 (7.11, 12.1) | 6.29 (4.50, 8.78) | 9.94 (7.27, 13.6) | 0.99     | 8.22 (6.00, 11.3)      | 7.11 (5.39, 9.37) | 10.6 (7.81, 14.5) | 10.1 (6.93, 14.5)  | 0.37     |
| Total motile sperm (progressive + non-progressive; WHO grades A–C) (%) | P, interaction = 0.13 |                   |                   |                   |          | P, interaction = 0.28  |                   |                   |                    |          |
| Lean men (BMI <25 kg/m <sup>2</sup> )                                  | 58.4 (55.0, 61.9)     | 56.7 (52.9, 60.5) | 56.7 (53.5, 60.0) | 55.2 (51.5, 58.8) | 0.25     | 55.8 (51.8, 59.7)      | 57.2 (53.6, 60.8) | 56.9 (53.5, 60.2) | 57.3 (53.1, 61.6)  | 0.68     |
| Overweight or obese men (BMI ≥25 kg/m <sup>2</sup> )                   | 50.4 (44.5, 56.3)     | 60.9 (55.7, 66.1) | 57.9 (51.5, 64.3) | 59.0 (52.9, 65.1) | 0.20     | 61.9 (55.8, 68.1)      | 58.3 (52.8, 63.7) | 52.5 (46.3, 58.7) | 55.3 (47.8, 62.8)  | 0.27     |

Models for sperm motility are further adjusted for time to start semen analysis (minutes).

<sup>a</sup>Adjusted for total calorie intake (kcal/day), BMI (kg/m<sup>2</sup>), smoking (current smoker versus not current smoker) and ejaculation abstinence time (hours).

\*LSD *post hoc* analyses  $P < 0.05$ , (Q1 = reference category).
