# Supplementary material
Source: PubMed Central journal article supplement (PMC4643528)
Supplement: supp_dev236_dev236supp_table3.pdf [file supp_dev236_dev236supp_table3.pdf]

**Supplementary Table SIII** Unadjusted associations of the Mediterranean and the Western patterns with testicular volume and reproductive hormones in Murcia Young Men's Study by quartiles (Q1–4) of consumption of the two dietary patterns (n = 209).

| Unadjusted means (95% CI)                           | Mediterranean pattern |                   |                   |                   |          | Western pattern   |                   |                   |                   |          |
|-----------------------------------------------------|-----------------------|-------------------|-------------------|-------------------|----------|-------------------|-------------------|-------------------|-------------------|----------|
|                                                     | Q1 (n = 53)           | Q2 (n = 51)       | Q3 (n = 53)       | Q4 (n = 52)       | P, trend | Q1 (n = 52)       | Q2 (n = 53)       | Q3 (n = 52)       | Q4 (n = 52)       | P, trend |
| Testicular volume (ml)                              | 21.2 (20.4, 22.1)     | 20.6 (19.7, 21.5) | 21.9 (20.9, 22.8) | 21.7 (20.8, 22.6) | 0.22     | 21.3 (20.4, 22.2) | 21.3 (20.4, 22.3) | 21.6 (20.7, 22.6) | 21.2 (20.2, 22.1) | 0.84     |
| Follicle-stimulating hormone (FSH) levels (IU/l)    | 2.18 (1.88, 2.53)     | 2.58 (2.22, 3.01) | 2.20 (1.89, 2.55) | 2.32 (2.00, 2.70) | 0.92     | 2.22 (1.91, 2.58) | 2.17 (1.87, 2.52) | 2.53 (2.17, 2.94) | 2.34 (2.02, 2.73) | 0.44     |
| Luteinizing hormone (LH) levels (IU/l)              | 4.13 (3.67, 4.59)     | 4.29 (3.82, 4.76) | 4.24 (3.78, 4.70) | 4.26 (3.79, 4.72) | 0.77     | 4.23 (3.78, 4.70) | 3.81 (3.36, 4.27) | 4.54 (4.10, 5.00) | 4.33 (3.87, 4.79) | 0.39     |
| Inhibin B levels (pg/ml)                            | 224 (203, 245)        | 192 (170, 213)*   | 187 (166, 208)*   | 206 (185, 227)    | 0.43     | 205 (183, 226)    | 197 (176, 218)    | 212 (191, 234)    | 195 (174, 217)    | 0.68     |
| Total testosterone levels (nmol/l)                  | 21.9 (20.1, 23.8)     | 20.2 (18.3, 22.1) | 22.7 (20.8, 24.6) | 22.4 (20.5, 24.3) | 0.38     | 21.2 (19.3, 23.1) | 21.9 (20.1, 23.8) | 23.4 (21.5, 25.3) | 20.7 (18.8, 22.6) | 0.76     |
| Free testosterone levels (ng/dl)                    | 14.2 (12.9, 15.5)     | 13.0 (11.7, 14.4) | 14.8 (13.5, 16.1) | 14.9 (13.7, 16.3) | 0.16     | 13.6 (12.3, 14.9) | 14.1 (12.8, 15.4) | 15.3 (13.9, 16.6) | 14.0 (12.7, 15.3) | 0.60     |
| Sex hormone binding globulin (SHBG) levels (nmol/l) | 32.3 (29.2, 35.5)     | 30.9 (27.7, 34.2) | 31.7 (28.6, 34.9) | 30.8 (27.5, 33.9) | 0.58     | 32.1 (28.9, 35.3) | 32.5 (29.4, 35.7) | 32.4 (29.2, 35.6) | 28.7 (25.5, 31.9) | 0.11     |
| Estradiol (E2) levels (pmol/l)                      | 74.2 (68.7, 80.2)     | 73.3 (67.7, 79.2) | 77.0 (71.2, 83.2) | 78.5 (72.6, 84.9) | 0.21     | 72.9 (67.5, 78.9) | 76.5 (70.8, 82.7) | 77.3 (71.5, 83.6) | 76.0 (70.3, 82.3) | 0.52     |

\*LSD *post hoc* analyses  $P < 0.05$ , (Q1 = reference category).
